1 Development of genetic markers for sexing *Cannabis sativa*  
2 seedlings

3

4 Djivan Prentout<sup>1</sup>, Olga Razumova<sup>2,3</sup>, H el ene Henri<sup>1</sup>, Mikhail Divashuk<sup>2</sup>, Gennady Karlov<sup>2</sup>,  
5 Gabriel AB Marais<sup>1,\*</sup>

6

7 1. *Laboratoire de Biom etrie et Biologie  volutive UMR 5558, Universit  Lyon 1, CNRS, F-*  
8 *69622 Villeurbanne, France*

9 2. *Laboratory of Applied Genomics and Crop Breeding, All-Russia Research Institute of*  
10 *Agricultural Biotechnology, Timiryazevskaya Str. 42, Moscow 127550, Russia*

11 3. *N. V. Tsitsin Main Botanical Garden of Russian Academy of Sciences, Botanicheskaya*  
12 *Str., Moscow 127276, Russia*

13

14 *\*corresponding author: Gabriel Marais; LBBE – UMR 5558, CNRS / Universit  Lyon 1,*  
15 *campus de la doua, 69622 Villeurbanne cedex, France; [gabriel.marais@univ-lyon.fr](mailto:gabriel.marais@univ-lyon.fr)*

16

17

Technical Note

17

18 **Abstract**

19 ***Cannabis sativa* is a dioecious plant with a XY system. Only females produce**  
20 **cannabinoids in large amount. Efficient male removal is an important issue for the**  
21 **cannabis industry. We have recently identified the sex chromosomes of *C. sativa*, which**  
22 **opens opportunities for developing universal genetic markers for early sexing of *C.***  
23 ***sativa* plants. Here we selected six Y-linked markers and designed PCR primers, which**  
24 **were tested on five hemp cultivars both dioecious and monoecious. We obtained**  
25 **promising results, which need to be extended using a larger number of individuals and a**  
26 **more diverse set of cultivars, including THC producing ones.**

27

## Technical Note

27 *Cannabis sativa* is a dioecious plant with XY chromosomes (Divashuk *et al.*, 2014). Only  
28 non-pollinated females produce THC and CBD (Small, 2015). Removing males as early as  
29 possible is thus a major issue for the THC/CBD industry. In *C. sativa*, however, sexual  
30 dimorphism is absent before the flowering stage as in many dioecious plants (Small, 2015;  
31 Barrett and Hough, 2013). Several methods have been developed to produce male-free crops  
32 (discussed in McKernan *et al.*, 2020). One of the most promising methods consists in  
33 identifying males before the flowering stage with Y-specific genetic markers, typically in *C.*  
34 *sativa* seedlings. A few genetic markers for sexing have been previously developed in *C.*  
35 *sativa* but accuracy or throughput need to be improved (discussed in Toth *et al.*, 2020). A  
36 recent study improved the throughput of MADC6, one of those genetic markers, using PACE  
37 - PCR Allele Competitive Extension (Törjek *et al.*, 2002; Toth *et al.*, 2020). The sex assay  
38 was conducted on 2,170 plants and 14 cultivars, and they correctly identified 98% of the  
39 females and 100% of males (in a sub-sample of 270 plants). However, MADC6 and the other  
40 available markers are located in retrotransposons and they might not be present in all *C. sativa*  
41 cultivars. Despite all these advances, we still need to develop universal genetic markers for  
42 sexing *C. sativa* seedlings.

43

44 In a recent study, we performed a genome-wide segregation analysis of *C. sativa* to  
45 identify sex-linked genes (Prentout *et al.*, 2020). We ran SEX-DETECTOR on genotyping data  
46 of a *C. sativa* cross and identified SNPs that show sex-linkage when looking at allele  
47 transmission from parents to progeny (Muyle *et al.*, 2016; Prentout *et al.*, 2020). SEX-  
48 DETECTOR identified more >550 sex-linked genes (Prentout *et al.*, 2020). Aligning those sex-  
49 linked genes onto a chromosome-level assembly of a *C. sativa* genome from Grassa *et al.*  
50 (2018), we found that the largest chromosome pair (number 1) was the sex chromosomes pair.  
51 Among the sex-linked genes that were identified by SEX-DETECTOR, ~350 were XY gene

## Technical Note

52 pairs and the highest synonymous divergence between X and Y sequences reached 40%.  
53 These most strongly divergent XY gene pairs are interesting because they have a very high  
54 chances to be present in all *C. sativa* populations/cultivars and thus offer a great opportunity  
55 to develop universal Y-linked genetic markers for early sexing of *C. sativa*. Here, we show  
56 the results on six such markers that have been tested on hemp cultivars.

57

## 58 **Methods**

59 We used the XY gene pairs with the highest synonymous divergence identified in Prentout *et*  
60 *al.* (2020), for which CDS length was greater than 300 pb. We aligned the sequences with  
61 CLC workbench tool ‘create alignment’ (version 8.0.1, see  
62 <https://www.quiagenbioinformatics.com>) and uses the tool ‘Design Primer’ for primer design.  
63 For each gene pair, we aligned the Y-linked sequence from our cross (male × female of hemp  
64 cultivar Zenitsa, see Prentout *et al.*, 2020) with three X-linked sequences, one of which was  
65 from our cross and the other two from a Purple Kush cultivar (THC producer) female and  
66 from a Finola cultivar (hemp) female (Van bakel *et al.*, 2011). This increased the probability  
67 of detecting X/Y fixed differences (shared by all individuals of the species) instead of X/Y  
68 polymorphism (specific to some populations). To design the primers, we selected coding  
69 regions with high X-Y divergence. We kept those with at least two fixed differences between  
70 X-linked and Y-linked sequences, and avoided complementary forward and reverse primers to  
71 avoid association between our primers during PCR.

72

73 We used the *in silico* PCR tool from the Van bakel lab  
74 (<http://genome.ccb.utoronto.ca/>) to test the size of the amplicons, and verify that a unique  
75 region of the genome was amplified. Our primers were tested *in silico* on both the Purple

## Technical Note

76 Kush and the Finola genomes. As both genomes are female genomes, if the X-linked primers  
77 resulted in amplification but the Y-linked did not, we validated the primers as sufficiently  
78 divergent between the X-linked and Y-linked copies.

79

80 We then tested our markers *in vitro* by PCR. Plant material was obtained from  
81 different cultivars and DNA was extracted. DNA isolation was performed from young leaves  
82 as described by Doyle and Doyle (1990) with some modifications. The extracting buffer  
83 contained 100 mM Tris-HCl (pH=8.0), 20 mM EDTA (pH=8.0), 2 M NaCl, 1.5% CTAB,  
84 1.5% PVP and 0.2%  $\beta$ -mercaptoethanol. A 15 mM ammonium acetate solution in 75%  
85 ethanol was used for DNA washing. The PCR program for the all primers contained the  
86 following steps: 95 °C for 5 min followed by 35 cycles of 94 °C for 30 sec, 55 °C for 1 min,  
87 and 72 °C for 1 min and a final step of 72°C for 7 min. The markers were tested on three  
88 dioecious hemp cultivars (Zenitsa, Viktoria and Ekaterinodar) and two monoecious hemp  
89 cultivars (1147|16 and Maria). As the monoecious plants are XX (Razumova *et al.*, 2014) the  
90 Y-linked markers primers are not supposed to amplify. They can thus serve as control.

91

## 92 **Results**

93 Using the approach described in Methods, we selected thirteen XY gene pairs and twelve  
94 autosomal genes. We designed primer pairs for both X-linked and Y-linked sequences (XY  
95 gene pairs) for the autosomal sequence (autosomal genes). All the thirteen genetic Y-linked  
96 and twelve autosomal markers were validated *in silico* (see Methods). The primers were first  
97 tested *in vitro* on Zenitsa plant material (also used in Prentout *et al.*, 2020). From this  
98 preliminary test, we selected six Y-linked and one autosomal markers that amplified well with  
99 the primers that we designed and the PCR conditions that we set.

Technical Note

100

101 **Table 1:** PCR validation of six Y-linked markers. Results are given for six Y-linked primer pairs and 1  
 102 autosomal (control) primer pair. Five different cultivars have been tested: three dioecious (Zenitsa,  
 103 Viktoria, Ekaterinodar) and two monoecious ('1447|16' and Maria). Sample sizes are indicated with  
 104 cultivars' names. We had roughly 50:50 males/females in all cultivars. The percent of individuals that  
 105 amplified is given for each marker in each cultivar. For monoecious cutlivars, plants are considered  
 106 females because their genotype is XX. Therefore, a PCR in monoecious male is not applicable (na).

| Cultivars                       | Y-linked marker 8 |    | Y-linked marker 10 |   | Y-linked marker 21 |    | Y-linked marker 23 |   | Y-linked marker 36 |    | Y-linked marker 37 |   | Autosomal marker 16 |     |
|---------------------------------|-------------------|----|--------------------|---|--------------------|----|--------------------|---|--------------------|----|--------------------|---|---------------------|-----|
|                                 | M                 | F  | M                  | F | M                  | F  | M                  | F | M                  | F  | M                  | F | M                   | F   |
| <b>Zenitsa</b><br>(n = 26)      | 100               | 0  | 100                | 0 | 100                | 0  | 100                | 0 | 100                | 0  | 100                | 0 | 100                 | 100 |
| <b>Viktoria</b><br>(n = 8)      | 100               | 0  | 100                | 0 | 100                | 0  | 100                | 0 | 100                | 0  | 100                | 0 | 100                 | 100 |
| <b>Ekaterinodar</b><br>(n = 14) | 80                | 11 | 100                | 0 | 80                 | 11 | 0                  | 0 | 80                 | 11 | 80                 | 0 | 100                 | 100 |
| <b>1447 16 (XX)</b><br>(n = 2)  | na                | 0  | na                 | 0 | na                 | 0  | na                 | 0 | na                 | 0  | na                 | 0 | na                  | 100 |
| <b>Maria (XX)</b><br>(n = 6)    | na                | 0  | na                 | 0 | na                 | 0  | na                 | 0 | na                 | 0  | na                 | 0 | na                  | 100 |

107

108 Table 1 shows the results of PCR experiments on those Y-linked and one autosomal  
 109 markers in five different cultivars (three dioecious and two monoecious). Except for the  
 110 Ekaterinodar cultivar, the Y-linked primers amplified in 100 % of males and 0 % of females  
 111 and monoecious cultivars. The autosomal control markers amplified in all tested individuals.  
 112 Amplicon size ranged from 174 to 305 bp.

## Technical Note

113

114

### 115 **Discussion**

116 We identified six very promising markers, which amplified only in males for the dioecious  
117 cultivars (except for Ekaterinodar) and did not amplify in monoecious cultivars. Results in  
118 Ekaterinodar were more ambiguous. We observed some amplification in one female for three  
119 markers: 8, 21 and 36 (see Table 1). Moreover, the markers 8, 21, 36 and 37 amplified only in  
120 80% of the males for this cultivar. Marker 23 did not amplify in Ekaterinodar. Only marker 10  
121 had amplification in 100% males and 0% females. It is unclear why results were not as good  
122 in this cultivar compared to others. It should be noted however that combining the results of  
123 the six markers identified correctly male and female plants in Ekaterinodar.

124

125 More generally, sample sizes were small and the rates of success are thus only very  
126 rough. More tests are thus necessary. We need to test our markers on a much larger number of  
127 plants, from a much more diversified set of cultivars (e.g. including THC producers).

128

129

Technical Note

129

130 **References**

131 Barrett SC, Hough J. 2013. Sexual dimorphism in flowering plants. *J Exp Bot* **64**(1): 67-82.

132 Divashuk, M. G., Alexandrov, O. S., Razumova, O. V., Kirov, I. V., & Karlov, G. I. (2014).

133 Molecular cytogenetic characterization of the dioecious *Cannabis sativa* with an XY

134 chromosome sex determination system. *PloS one*, *9*(1).

135 Doyle, J.J., Doyle, J.L. (1990). Isolation of plant DNA from fresh tissue. *Focus* *12*:13–15

136 Grassa, C. J., Wenger, J. P., Dabney, C., Poplawski, S. G., Motley, S. T., Michael, T. P., ... &

137 Weiblen, G. D. (2018). A complete *Cannabis* chromosome assembly and adaptive

138 admixture for elevated cannabidiol (CBD) content. *BioRxiv*, 458083.

139 McKernan, K. J., Helbert, Y., Kane, L. T., Ebling, H., Zhang, L., Liu, B., ... & Concepcion, G.

140 (2020). Sequence and annotation of 42 cannabis genomes reveals extensive copy

141 number variation in cannabinoid synthesis and pathogen resistance genes. *BioRxiv*.

142 Muyle, A., Käfer, J., Zemp, N., Mousset, S., Picard, F., & Marais, G. A. (2016). SEX-

143 DETector: a probabilistic approach to study sex chromosomes in non-model organisms.

144 *Genome biology and evolution*, *8*(8), 2530-2543.

145 Prentout, D., Razumova, O., Rhoné, B., Badouin, H., Henri, H., Feng, C., ... & Marais, G. A.

146 (2020). An efficient RNA-seq-based segregation analysis identifies the sex

147 chromosomes of *Cannabis sativa*. *Genome Research*, *30*(2), 164-172.

148 Razumova, O. V., Alexandrov, O. S., Divashuk, M. G., Sukhorada, T. I., & Karlov, G. I.

149 (2016). Molecular cytogenetic analysis of monoecious hemp (*Cannabis sativa* L.)

150 cultivars reveals its karyotype variations and sex chromosomes

151 constitution. *Protoplasma*, *253*(3), 895-901.



## Technical Note

- 152 Small, E. (2015). Evolution and classification of *Cannabis sativa* (marijuana, hemp) in  
153 relation to human utilization. *The botanical review*, 81(3), 189-294.
- 154 Törjék, O., Bucherna, N., Kiss, E., Homoki, H., Finta-Korpelová, Z., Bócsa, I., ... & Heszky,  
155 L. E. (2002). Novel male-specific molecular markers (MADC5, MADC6) in hemp.  
156 *Euphytica*, 127(2), 209-218.
- 157 Toth, J. A., Stack, G. M., Cala, A. R., Carlson, C. H., Wilk, R. L., Crawford, J. L., ... & Smart,  
158 L. B. Development and validation of genetic markers for sex and cannabinoid  
159 chemotype in *Cannabis sativa* L. *GCB Bioenergy*.
- 160 Van Bakel, H., Stout, J. M., Cote, A. G., Tallon, C. M., Sharpe, A. G., Hughes, T. R., & Page,  
161 J. E. (2011). The draft genome and transcriptome of *Cannabis sativa*. *Genome biology*,  
162 12(10), R102.
